# Supplementary material
Source: PubMed Central journal article supplement (PMC3218234)
Supplement: NIHMS333264-supplement-1_si_001.pdf [file NIHMS333264-supplement-1_si_001.pdf]

# Supporting Information

## **Chemoenzymatic Synthesis and Fc $\gamma$ Receptor Binding of Homogeneous Glycoforms of Antibody Fc Domain. Presence of a Bisecting Sugar Moiety Enhances the Affinity of Fc to Fc $\gamma$ IIIa Receptor**

*Guozhang Zou, Hirofumi Ochiai, Wei Huang, Qiang Yang, Cishan Li, and Lai-Xi Wang\**

Institute of Human Virology and Department of Biochemistry & Molecular Biology, University of Maryland School of Medicine, Baltimore, MD 21201, USA

**Complete ref. 32:**

Li, H.; Sethuraman, N.; Stadheim, T. A.; Zha, D.; Prinz, B.; Ballew, N.; Bobrowicz, P.; Choi, B. K.; Cook, W. J.; Cukan, M.; Houston-Cummings, N. R.; Davidson, R.; Gong, B.; Hamilton, S. R.; Hoopes, J. P.; Jiang, Y.; Kim, N.; Mansfield, R.; Nett, J. H.; Rios, S.; Strawbridge, R.; Wildt, S.; Gerngross, T. U. *Nat. Biotechnol.* **2006**, *24*, 210-215.

**M E T D T L L L W V L L L W V P G S T G**  
 DAADIQHSGGRSSEPKSCDKTHTCPPCPAPELLGGPSVFLFPPKPKDTLMISRTPEVTCVVVDVSHEDP  
 EVKFNWYVDGVEVHNAKTKPREEQY**NST**YRVVSVLTVLHQDWLNGKEYKCKVSNKALPAPIEKTISKAK  
 GQPREPQVYTLPPSREEMTKNQVSLTCLVKGFYPSDIAVEWESNGQPENNYKTTPPVLDSDGSFFLYSK  
 LTVDKSRWQOGNVSFCSVMHEALHNHYTQKSLSLSPGK**SLEGPRFE**GKPIPNLLGLDSTRTGHHHHHHH

**Figure S1. The amino acid sequence of the recombinant human IgG1-Fc.** The Ig K signal peptide were underlined and in bold; the conserved N-glycosylation sequence was marked red; the two segments that are italicized and in blue were amino acids introduced by multiple cloning sites; the V5 tag from simian virus 5 (SV5) was italicized and underlined.

Calculations of the molecular mass for the Fc glycoforms

Number of residues = 276

Reduced, monomeric Fc, MW = 30863.62 Da (average)

Fc homodimer: MW = 61713 Da (with 7 disulfide bonds)

GlcNAc-Fc, calcd. M = 62119 Da

Man9GlcNAc2-Fc, calcd. M = 65444 Da

Fc-1, calcd. M = 63905 Da

Fc-2, calcd. M = 64229 Da

Fc-3, calcd. M = 63822 Da

Fc-4, calcd. M = 63498 Da

Fc-5, calcd. M = 63498 Da

Fc-6, calcd. M = 62849 Da

A.

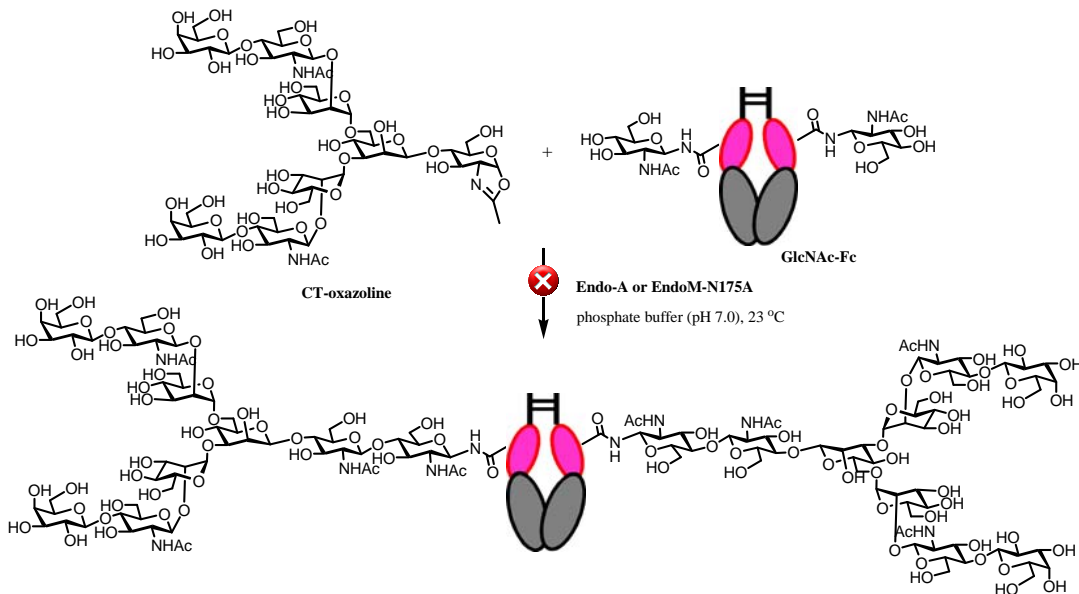

B.

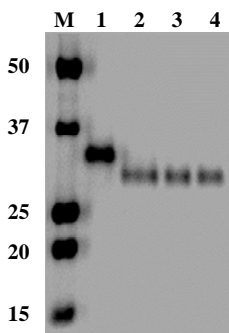

**Figure S2. Analysis of the transglycosylation of GlcNAc-Fc with complex type N-glycan oxazoline by Endo-A and Endo-M mutant (EndoM-N175A).** The reaction was performed as follows: A solution of GlcNAc-Fc (5 nmol) complex-type glycan oxazoline (CT-oxazoline) (100 nmol) in a phosphate buffer (50 mM, pH 7.0, 50  $\mu$ L) was incubated with Endo-A (2  $\mu$ g) or EndoM-N175A (5  $\mu$ g) 23°C. Aliquots were taken and analyzed by SDS-PAGE.

Panel A, the reaction scheme. Panel B, SDS-PAGE: Lane M, protein marker; lane 1, HM-Fc; lane 2, GlcNAc-Fc; lane 3, incubation of GlcNAc-Fc, CT-oxazoline, and Endo-A at 23 °C for 3 h; lane 4, incubation of GlcNAc-Fc, CT-oxazoline, and EndoM-N175A at 23 °C for 3 h. No transglycosylation was observed between GlcNAc-Fc and the complex-type glycan oxazoline under the given conditions.
